# Supplementary material
Source: PubMed Central journal article supplement (PMC4896699)
Supplement: pnas.1524465113.sapp.pdf [file pnas.1524465113.sapp.pdf]

1 **Supporting information: Appendix**

2 **Tests for robustness of the richness-biomass relationship.** Because our results are based on  
3 observational data, establishing causality of the diversity-biomass relationship faces the  
4 challenge that richness estimates depend inherently on sample size (number of individuals). We  
5 took several measures to evaluate the importance of this effect and minimize it. Most  
6 importantly, our estimates of species richness based on sample coverage (1) rigorously account  
7 for this dependence, allowing comparisons among samples with different numbers of  
8 individuals. To test whether any residual correlation between abundance and richness estimate  
9 remained after this correction we conducted three additional analyses. First, we asked whether  
10 the richness-biomass relationship was unduly influenced by small samples (surveys with few  
11 fish). We created a new data subset by removing all surveys with fewer than 100 individual fish  
12 observed, and reran the global analysis on this subset. Fitting the global hierarchical model to  
13 this subset (3873 surveys of 4556 in the complete data set) produced slightly smaller estimates of  
14 the effects of species richness (standardized  $\beta = 0.172 \pm 0.034$ ) and functional diversity ( $0.178 \pm$   
15  $0.023$ ) on fish biomass, but these diversity components remained among the strongest predictors.  
16 Removal of surveys with fewer than 500 individuals (leaving 2466 surveys) produced a slightly  
17 larger estimate of the effect of species richness ( $0.200 \pm 0.042$ ) and a smaller estimate of  
18 functional diversity ( $0.165 \pm 0.030$ ). For all of these estimates,  $P < 0.001$ .

19 A second analysis similarly supported the robustness of the richness effect on biomass.  
20 Comparison of the slope of the richness-biomass relationship estimated separately for each  
21 ecoregion showed a stronger relationship in ecoregions with fewer individuals but the effect of  
22 estimated richness on biomass nevertheless remained positive even where mean abundance per  
23 survey approached 10,000 individuals (Fig. 4a).

24 Third, we partially decoupled the influence of survey-level abundance on richness  
25 estimates by using regional species pool size as the estimate of richness in predicting biomass.  
26 As an estimate of species pool size we used the observed richness within the surrounding  
27 ecoregion. Because the validity of this approach depends on a robust estimate of regional  
28 richness, we restricted the analysis to a subset of ecoregions with at least 20 surveys each and  
29 included only surveys with >50 individual fish. These criteria ensured that the estimated species  
30 pool for each ecoregion in the analysis was based on a minimum of 1000 individuals (i.e.,  
31 minima of 20 surveys x 50 individuals per survey). Applying these criteria produced a data  
32 subset of 1374 surveys (of 4556 total) from 26 ecoregions (of 75 total). Fitting the global model  
33 to this data subset produced a standardized estimate of the partial effect of log ecoregion richness  
34 on log survey biomass of  $\beta = 0.404 \pm 0.130$  ( $P = 0.012$ ). Thus, the estimated effect of ecoregion-  
35 level richness on biomass was even stronger than that based on survey-level richness, although  
36 the P-value was larger due in part to the 70% reduction in sample size compared with the full  
37 data set.

38 Finally, there is some evidence that the relationship between species richness and  
39 biomass production differs among scales, with stronger relationships at the regional than local  
40 scales (2, 3). To explore this possibility we fit parallel models (same set of predictor variables)  
41 using survey data aggregated at site and ecoregion scales. Results were generally quite similar  
42 among scales, qualitatively and quantitatively (Fig. 2a-d): fish biomass was affected similarly at  
43 both scales by diversity, human population, temperature, and depth.

44 A different challenge in testing the diversity-biomass relationships with observational  
45 data stems from the possibility that the relationship reflects a shared correlation with some  
46 unmeasured variable. We tested for such spurious correlations in two ways. First, we tested

47 whether the diversity effect on biomass was robust to shared correlations by conducting a  
48 random forest analysis with species richness, functional diversity, and 25 other predictors, and  
49 found that (coverage-corrected) species richness and functional diversity were the top two  
50 predictors (SI Appendix, Fig. S2). Second, our use of hierarchical mixed models accounted for  
51 shared correlations by measuring environmental and human-impact variables as well as  
52 unexplained spatial variation in biomass by including random terms for marine realm, province,  
53 and ecoregion. For example, if a bivariate correlation between richness and biomass was actually  
54 driven by effects of temperature on both, then including all three variables in a model should  
55 return a strong partial effect of temperature on biomass with no partial effect of richness. As a  
56 final check on the robustness of our model we tested whether our final selection of variables  
57 influenced the estimated richness effect on biomass by refitting the global model with 0-8  
58 environmental predictors (functional diversity was left out to simplify the model interpretation),  
59 and each time calculated the partial effect of estimated richness. The number of other predictors  
60 had almost no effect on the estimated effect of richness (SI Appendix, Fig. S5a). In summary,  
61 one or both components of biodiversity were consistently strong predictors of fish community  
62 biomass across latitudes, regions, and trophic levels in all our analyses.

63 Finally, diversity can be modeled as a predictor only for sites where fish are present. All  
64 surveys used in our analyses recorded fish, but not all trophic groups and size classes were  
65 present on all surveys. Therefore, analyses of specific trophic levels and of large fishes used only  
66 subsets of the data. To check whether use of such subsets changed our estimates of the effects of  
67 predictors, we fit a second set of models for each trophic level, and for large fishes, that excluded  
68 diversity as predictors. This ensured that all surveys were included (even those with no  
69 individuals of the group in question); the regression coefficients produced by these models (SI

70 Appendix, Figs. S3b, S6) can be interpreted as quantifying the importance of human population  
71 and environmental drivers in influencing both presence/absence and abundance of the focal  
72 group. The results show that exclusion of diversity in this way generally had little influence on  
73 estimates of human and environmental drivers (compare SI Appendix, Figs. S3a,b, S6). The  
74 exceptions were top carnivores and planktivores, which showed stronger forcing by temperature  
75 when diversity was excluded (compare Figs. 3a,d; SI Appendix, S6a,d); this can be interpreted to  
76 mean that top carnivores and planktivores were present primarily at warmer sites.

77

78 **Interactions of diversity with stressors.** We tested whether species richness stabilized reef fish  
79 biomass against stressors by fitting separate models that included interactions of species richness  
80 with rising temperature, temperature variability, or human impact (population index) (SI  
81 Appendix, Table S2). To explore visually the findings (see Results) that high species richness  
82 stabilized biomass against rising and variable temperatures, we divided the dataset into sites  
83 below (low-richness) and above (high-richness) the median richness value, and fit separate  
84 regressions of biomass against mean annual temperature (Fig. 2e,f) and annual temperature range  
85 (Fig. 2g,h).

86 A possible alternative hypothesis for the steeper decline in biomass with temperature  
87 range in low-richness communities is that sites with higher temperature variability have lower  
88 coral cover, and therefore lower fish biomass. To explore this hypothesis we first fit the global  
89 model described above with addition of log coral cover, using only tropical sites since coral is  
90 absent or low at temperate sites. Log coral cover had no significant partial effect on fish biomass  
91 ( $\beta = 0. -0.041 \pm 0.039$ ,  $P = 0.291$ ) when the other predictors were included in the model. We then  
92 fit the same model with an interaction between log coral cover and temperature range, to test

93 whether higher temperature range and low coral cover might explain the difference in biomass  
94 between low- and high-richness tropical sites. There was no significant interaction between log  
95 coral cover and temperature range ( $P = 0.660$ ). Nor was coral cover lower in more thermally  
96 variable tropical environments ( $P = 0.232$ ).

97

#### 98 **References cited**

- 99 1. Chao A, Jost L (2012) Coverage-based rarefaction and extrapolation: standardizing samples  
100 by completeness rather than size. *Ecology* 93(12):2533–2547.
- 101 2. Bond EM, Chase JM (2002) Biodiversity and ecosystem functioning at local and regional  
102 spatial scales. *Ecol Letters* 5:467–470.
- 103 3. Chase JM, Leibold MA (2002) Spatial scale dictates the productivity-biodiversity  
104 relationship. *Nature* 416(6879):427–430.

105

106

107 **Table S1:** SEM coefficients, standard errors, and P-values for the hierarchical model fit  
 108 separately for the global data set, temperate and tropical data sets, individual trophic levels, for  
 109 large (> 35 cm) fishes, and using observed rather than estimated richness.

110

111 **Table S1a:** Standardized coefficients (scaled by mean and variance) from the global structural  
 112 equation model including all fishes. Coefficients correspond to arrow widths in Figure 1a and  
 113 Extended Data Figure 1.

| <b>Response</b>      | <b>Predictor</b>                       | <b>Estimate</b> | <b>Standard error</b> | <b>P-value</b> |
|----------------------|----------------------------------------|-----------------|-----------------------|----------------|
| Biomass              | Functional diversity                   | 0.230           | 0.019                 | <b>0.000</b>   |
| Biomass              | log <sub>10</sub> (Estimated richness) | 0.189           | 0.027                 | <b>0.000</b>   |
| Biomass              | Temperature (range)                    | -0.252          | 0.037                 | <b>0.000</b>   |
| Biomass              | Depth                                  | 0.101           | 0.015                 | <b>0.000</b>   |
| Biomass              | log <sub>10</sub> (Population index)   | -0.164          | 0.042                 | <b>0.000</b>   |
| Biomass              | Temperature (mean)                     | 0.296           | 0.090                 | <b>0.001</b>   |
| Biomass              | Salinity                               | -0.117          | 0.057                 | <b>0.041</b>   |
| Biomass              | log <sub>10</sub> (Chlorophyll)        | 0.043           | 0.033                 | 0.198          |
| Biomass              | log <sub>10</sub> (Nitrate)            | 0.028           | 0.053                 | 0.589          |
| Biomass              | log <sub>10</sub> (PAR)                | -0.027          | 0.073                 | 0.708          |
| Biomass              | log <sub>10</sub> (Phosphate)          | -0.001          | 0.058                 | 0.985          |
| Functional diversity | log <sub>10</sub> (Estimated richness) | 0.221           | 0.034                 | <b>0.000</b>   |
| Functional diversity | Temperature (range)                    | 0.263           | 0.047                 | <b>0.000</b>   |
| Functional diversity | Temperature (mean)                     | 0.494           | 0.133                 | <b>0.000</b>   |
| Functional diversity | log <sub>10</sub> (Nitrate)            | -0.169          | 0.069                 | <b>0.014</b>   |
| Functional diversity | log <sub>10</sub> (Phosphate)          | 0.162           | 0.074                 | <b>0.028</b>   |
| Functional diversity | Salinity                               | 0.132           | 0.076                 | 0.080          |
| Functional diversity | log <sub>10</sub> (Chlorophyll)        | 0.022           | 0.043                 | 0.603          |
| Functional diversity | log <sub>10</sub> (Population index)   | 0.021           | 0.055                 | 0.704          |

|                                        |                                      |        |       |              |
|----------------------------------------|--------------------------------------|--------|-------|--------------|
| Functional diversity                   | Depth                                | 0.005  | 0.019 | 0.779        |
| Functional diversity                   | log <sub>10</sub> (PAR)              | 0.021  | 0.094 | 0.823        |
| log <sub>10</sub> (Estimated richness) | Temperature (mean)                   | 0.489  | 0.089 | <b>0.000</b> |
| log <sub>10</sub> (Estimated richness) | Temperature (range)                  | -0.143 | 0.033 | <b>0.000</b> |
| log <sub>10</sub> (Estimated richness) | log <sub>10</sub> (Chlorophyll)      | -0.092 | 0.030 | <b>0.002</b> |
| log <sub>10</sub> (Estimated richness) | log <sub>10</sub> (Population index) | 0.081  | 0.038 | <b>0.036</b> |
| log <sub>10</sub> (Estimated richness) | log <sub>10</sub> (PAR)              | -0.130 | 0.064 | <b>0.043</b> |
| log <sub>10</sub> (Estimated richness) | Depth                                | -0.020 | 0.014 | 0.159        |
| log <sub>10</sub> (Estimated richness) | Salinity                             | 0.053  | 0.051 | 0.301        |
| log <sub>10</sub> (Estimated richness) | log <sub>10</sub> (Phosphate)        | -0.023 | 0.052 | 0.658        |
| log <sub>10</sub> (Estimated richness) | log <sub>10</sub> (Nitrate)          | -0.006 | 0.047 | 0.905        |
| log <sub>10</sub> (Chlorophyll)        | Temperature (range)                  | 0.348  | 0.026 | <b>0.000</b> |
| log <sub>10</sub> (Chlorophyll)        | log <sub>10</sub> (Population index) | 0.198  | 0.036 | <b>0.000</b> |
| log <sub>10</sub> (Chlorophyll)        | Salinity                             | -0.292 | 0.060 | <b>0.000</b> |
| log <sub>10</sub> (Chlorophyll)        | Temperature (mean)                   | -0.367 | 0.085 | <b>0.000</b> |
| log <sub>10</sub> (Chlorophyll)        | Depth                                | -0.036 | 0.010 | <b>0.001</b> |
| log <sub>10</sub> (Chlorophyll)        | log <sub>10</sub> (PAR)              | 0.185  | 0.059 | <b>0.002</b> |
| log <sub>10</sub> (Chlorophyll)        | log <sub>10</sub> (Phosphate)        | 0.141  | 0.046 | <b>0.002</b> |
| log <sub>10</sub> (Chlorophyll)        | log <sub>10</sub> (Nitrate)          | 0.089  | 0.041 | <b>0.031</b> |
| log <sub>10</sub> (Phosphate)          | Salinity                             | -0.681 | 0.049 | <b>0.000</b> |
| log <sub>10</sub> (Phosphate)          | Temperature (mean)                   | -0.853 | 0.067 | <b>0.000</b> |
| log <sub>10</sub> (Phosphate)          | log <sub>10</sub> (PAR)              | -0.290 | 0.040 | <b>0.000</b> |
| log <sub>10</sub> (Phosphate)          | Temperature (range)                  | -0.036 | 0.019 | 0.061        |
| log <sub>10</sub> (Phosphate)          | log <sub>10</sub> (Population index) | -0.035 | 0.027 | 0.197        |
| log <sub>10</sub> (Phosphate)          | Depth                                | 0.000  | 0.008 | 0.992        |
| log <sub>10</sub> (Nitrate)            | log <sub>10</sub> (PAR)              | -0.884 | 0.044 | <b>0.000</b> |
| log <sub>10</sub> (Nitrate)            | Salinity                             | -0.638 | 0.055 | <b>0.000</b> |

|                             |                                      |        |       |              |
|-----------------------------|--------------------------------------|--------|-------|--------------|
| log <sub>10</sub> (Nitrate) | Temperature (mean)                   | -0.842 | 0.075 | <b>0.000</b> |
| log <sub>10</sub> (Nitrate) | Temperature (range)                  | -0.156 | 0.021 | <b>0.000</b> |
| log <sub>10</sub> (Nitrate) | Depth                                | 0.030  | 0.008 | <b>0.000</b> |
| log <sub>10</sub> (Nitrate) | log <sub>10</sub> (Population index) | -0.086 | 0.030 | <b>0.004</b> |

114

115



116 **Table S1b:** Standardized coefficients (scaled by mean and variance) from the global model  
 117 predicting fish biomass including only fishes >35 cm in total length.

| <b>Predictor</b>                       | <b>Estimate</b> | <b>Standard error</b> | <b>P-value</b> |
|----------------------------------------|-----------------|-----------------------|----------------|
| log <sub>10</sub> (Estimated richness) | 0.357           | 0.040                 | <b>0.000</b>   |
| Depth                                  | 0.153           | 0.024                 | <b>0.000</b>   |
| Functional diversity                   | 0.142           | 0.029                 | <b>0.000</b>   |
| log <sub>10</sub> (Population index)   | -0.280          | 0.057                 | <b>0.000</b>   |
| Temperature (mean)                     | -0.250          | 0.108                 | <b>0.021</b>   |
| Temperature (range)                    | -0.102          | 0.049                 | <b>0.038</b>   |
| log <sub>10</sub> (PAR)                | 0.144           | 0.089                 | 0.106          |
| Salinity                               | -0.091          | 0.071                 | 0.204          |
| log <sub>10</sub> (Chlorophyll)        | 0.040           | 0.050                 | 0.418          |
| log <sub>10</sub> (Nitrate)            | 0.045           | 0.068                 | 0.507          |
| log <sub>10</sub> (Phosphate)          | 0.008           | 0.074                 | 0.916          |

118

119

120 **Table S1c:** Standardized coefficients (scaled by mean and variance) from the global model  
 121 predicting fish biomass including only temperate sites.

| <b>Predictor</b>                       | <b>Estimate</b> | <b>Standard error</b> | <b>P-value</b> |
|----------------------------------------|-----------------|-----------------------|----------------|
| Functional diversity                   | 0.234           | 0.025                 | <b>0.000</b>   |
| Temperature (range)                    | -0.257          | 0.038                 | <b>0.000</b>   |
| log <sub>10</sub> (Estimated richness) | 0.155           | 0.029                 | <b>0.000</b>   |
| Depth                                  | 0.110           | 0.021                 | <b>0.000</b>   |
| Temperature (mean)                     | 0.431           | 0.090                 | <b>0.000</b>   |
| Salinity                               | -0.156          | 0.061                 | <b>0.011</b>   |
| log <sub>10</sub> (Population index)   | -0.083          | 0.035                 | <b>0.020</b>   |
| log <sub>10</sub> (Nitrate)            | 0.170           | 0.075                 | <b>0.023</b>   |
| log <sub>10</sub> (Chlorophyll)        | 0.053           | 0.035                 | 0.132          |
| log <sub>10</sub> (Phosphate)          | -0.049          | 0.079                 | 0.532          |
| log <sub>10</sub> (PAR)                | 0.044           | 0.083                 | 0.597          |

122  
 123

124 **Table S1d:** Standardized coefficients (scaled by mean and variance) from the global model  
 125 predicting fish biomass including only tropical sites.

| <b>Predictor</b>                       | <b>Estimate</b> | <b>Standard error</b> | <b>P-value</b> |
|----------------------------------------|-----------------|-----------------------|----------------|
| Functional diversity                   | 0.301           | 0.041                 | <b>0.000</b>   |
| log <sub>10</sub> (Estimated richness) | 0.166           | 0.041                 | <b>0.000</b>   |
| log <sub>10</sub> (Population index)   | -0.292          | 0.076                 | <b>0.000</b>   |
| Depth                                  | 0.074           | 0.031                 | <b>0.016</b>   |
| Salinity                               | -0.233          | 0.110                 | <b>0.035</b>   |
| log <sub>10</sub> (Chlorophyll)        | -0.131          | 0.067                 | 0.051          |
| Temperature (mean)                     | 0.105           | 0.104                 | 0.313          |
| log <sub>10</sub> (PAR)                | 0.048           | 0.073                 | 0.512          |
| log <sub>10</sub> (Nitrate)            | -0.051          | 0.107                 | 0.635          |
| log <sub>10</sub> (Phosphate)          | -0.020          | 0.109                 | 0.858          |
| Temperature (range)                    | 0.015           | 0.084                 | 0.861          |

126

127

128 **Table S1e:** Standardized coefficients (scaled by mean and variance) from the global model  
 129 predicting fish biomass including only top carnivores.

| <b>Predictor</b>                       | <b>Estimate</b> | <b>Standard error</b> | <b>P-value</b> |
|----------------------------------------|-----------------|-----------------------|----------------|
| Functional diversity                   | 0.206           | 0.022                 | <b>0.000</b>   |
| log <sub>10</sub> (Population index)   | -0.128          | 0.038                 | <b>0.001</b>   |
| log <sub>10</sub> (Chlorophyll)        | 0.118           | 0.036                 | <b>0.001</b>   |
| Depth                                  | 0.047           | 0.017                 | <b>0.007</b>   |
| Salinity                               | -0.098          | 0.045                 | <b>0.032</b>   |
| log <sub>10</sub> (Nitrate)            | 0.101           | 0.050                 | <b>0.045</b>   |
| log <sub>10</sub> (Estimated richness) | 0.041           | 0.029                 | 0.159          |
| log <sub>10</sub> (PAR)                | 0.080           | 0.066                 | 0.230          |
| Temperature (range)                    | -0.034          | 0.041                 | 0.404          |
| Temperature (mean)                     | 0.052           | 0.077                 | 0.495          |
| log <sub>10</sub> (Phosphate)          | -0.036          | 0.054                 | 0.502          |

130

131

132 **Table S1f:** Standardized coefficients (scaled by mean and variance) from the global model  
 133 predicting fish biomass including only benthic carnivores.

| <b>Predictor</b>                       | <b>Estimate</b> | <b>Standard error</b> | <b>P-value</b> |
|----------------------------------------|-----------------|-----------------------|----------------|
| Functional diversity                   | 0.128           | 0.024                 | <b>0.000</b>   |
| Depth                                  | 0.096           | 0.020                 | <b>0.000</b>   |
| Temperature (range)                    | -0.207          | 0.046                 | <b>0.000</b>   |
| log <sub>10</sub> (Population index)   | -0.172          | 0.053                 | <b>0.001</b>   |
| log <sub>10</sub> (Chlorophyll)        | 0.081           | 0.043                 | 0.060          |
| Salinity                               | -0.115          | 0.070                 | 0.100          |
| Temperature (mean)                     | -0.155          | 0.104                 | 0.135          |
| log <sub>10</sub> (Nitrate)            | 0.086           | 0.063                 | 0.173          |
| log <sub>10</sub> (Estimated richness) | -0.044          | 0.034                 | 0.188          |
| log <sub>10</sub> (PAR)                | 0.093           | 0.090                 | 0.305          |
| log <sub>10</sub> (Phosphate)          | -0.042          | 0.074                 | 0.571          |

134

135

136 **Table S1g:** Standardized coefficients (scaled by mean and variance) from the global model  
 137 predicting fish biomass including only herbivores.

| <b>Predictor</b>                       | <b>Estimate</b> | <b>Standard error</b> | <b>P-value</b> |
|----------------------------------------|-----------------|-----------------------|----------------|
| Functional diversity                   | 0.123           | 0.019                 | <b>0.000</b>   |
| Temperature (range)                    | -0.168          | 0.034                 | <b>0.000</b>   |
| log <sub>10</sub> (Chlorophyll)        | -0.095          | 0.031                 | <b>0.002</b>   |
| Depth                                  | 0.037           | 0.014                 | <b>0.008</b>   |
| log <sub>10</sub> (Estimated richness) | 0.063           | 0.024                 | <b>0.010</b>   |
| log <sub>10</sub> (Phosphate)          | -0.118          | 0.050                 | <b>0.018</b>   |
| log <sub>10</sub> (PAR)                | 0.125           | 0.060                 | <b>0.036</b>   |
| log <sub>10</sub> (Population index)   | -0.059          | 0.035                 | 0.095          |
| Temperature (mean)                     | -0.078          | 0.083                 | 0.348          |
| log <sub>10</sub> (Nitrate)            | -0.037          | 0.044                 | 0.401          |
| Salinity                               | -0.024          | 0.056                 | 0.669          |

138  
 139

140 **Table S1h:** Standardized coefficients (scaled by mean and variance) from the global model  
 141 predicting fish biomass including only planktivores.

| <b>Predictor</b>                       | <b>Estimate</b> | <b>Standard error</b> | <b>P-value</b> |
|----------------------------------------|-----------------|-----------------------|----------------|
| Depth                                  | 0.168           | 0.015                 | <b>0.000</b>   |
| log <sub>10</sub> (Estimated richness) | 0.159           | 0.024                 | <b>0.000</b>   |
| Functional diversity                   | 0.053           | 0.018                 | <b>0.003</b>   |
| log <sub>10</sub> (Population index)   | -0.070          | 0.038                 | 0.063          |
| Temperature (range)                    | -0.058          | 0.037                 | 0.123          |
| log <sub>10</sub> (Nitrate)            | -0.052          | 0.050                 | 0.302          |
| Temperature (mean)                     | 0.090           | 0.088                 | 0.305          |
| log <sub>10</sub> (Phosphate)          | 0.054           | 0.054                 | 0.317          |
| log <sub>10</sub> (PAR)                | 0.039           | 0.068                 | 0.566          |
| log <sub>10</sub> (Chlorophyll)        | -0.015          | 0.034                 | 0.662          |
| Salinity                               | 0.014           | 0.051                 | 0.792          |

142

143

144 **Table S1i:** Standardized coefficients (scaled by mean and variance) from the global model  
 145 predicting fish biomass including only invertivores.

| <b>Predictor</b>                       | <b>Estimate</b> | <b>Standard error</b> | <b>P-value</b> |
|----------------------------------------|-----------------|-----------------------|----------------|
| Functional diversity                   | 0.128           | 0.024                 | <b>0.000</b>   |
| Depth                                  | 0.096           | 0.020                 | <b>0.000</b>   |
| Temperature (range)                    | -0.207          | 0.046                 | <b>0.000</b>   |
| log <sub>10</sub> (Population index)   | -0.172          | 0.053                 | <b>0.001</b>   |
| log <sub>10</sub> (Chlorophyll)        | 0.081           | 0.043                 | 0.060          |
| Salinity                               | -0.115          | 0.070                 | 0.100          |
| Temperature (mean)                     | -0.155          | 0.104                 | 0.135          |
| log <sub>10</sub> (Nitrate)            | 0.086           | 0.063                 | 0.173          |
| log <sub>10</sub> (Estimated richness) | -0.044          | 0.034                 | 0.188          |
| log <sub>10</sub> (PAR)                | 0.093           | 0.090                 | 0.305          |
| log <sub>10</sub> (Phosphate)          | -0.042          | 0.074                 | 0.571          |

146  
 147



148 **Table S1j:** Standardized coefficients (scaled by mean and variance) from the global model  
 149 predicting fish biomass at the ecoregion level.

| <b>Predictor</b>                       | <b>Estimate</b> | <b>Standard error</b> | <b>P-value</b> |
|----------------------------------------|-----------------|-----------------------|----------------|
| log <sub>10</sub> (Population index)   | -0.192          | 0.054                 | <b>0.001</b>   |
| Temperature (range)                    | -0.231          | 0.075                 | <b>0.003</b>   |
| Functional diversity                   | 0.168           | 0.064                 | <b>0.012</b>   |
| log <sub>10</sub> (Chlorophyll)        | 0.193           | 0.079                 | <b>0.018</b>   |
| Depth                                  | 0.156           | 0.066                 | <b>0.023</b>   |
| log <sub>10</sub> (Estimated richness) | 0.202           | 0.132                 | 0.132          |
| Temperature (mean)                     | 0.154           | 0.136                 | 0.264          |
| log <sub>10</sub> (Nitrate)            | -0.061          | 0.095                 | 0.521          |
| log <sub>10</sub> (Phosphate)          | -0.063          | 0.101                 | 0.535          |
| Salinity                               | 0.011           | 0.064                 | 0.870          |
| log <sub>10</sub> (PAR)                | -0.016          | 0.099                 | 0.871          |

150

151 **Table S1k:** Standardized coefficients (scaled by mean and variance) from the global model  
 152 predicting fish biomass at the site level using raw (observed) species richness.

| <b>Predictor</b>                      | <b>Estimate</b> | <b>Standard error</b> | <b>P-value</b> |
|---------------------------------------|-----------------|-----------------------|----------------|
| log <sub>10</sub> (Observed richness) | 0.7887          | 0.0331                | <b>0.0000</b>  |
| Depth                                 | 0.0933          | 0.0132                | <b>0.0000</b>  |
| Functional diversity                  | 0.0910          | 0.0176                | <b>0.0000</b>  |
| Temperature (range)                   | -0.1665         | 0.0329                | <b>0.0000</b>  |
| log <sub>10</sub> (Population index)  | -0.1575         | 0.0385                | <b>0.0000</b>  |
| Temperature (mean)                    | -0.2238         | 0.0795                | <b>0.0050</b>  |
| Salinity                              | -0.1397         | 0.0519                | <b>0.0072</b>  |
| log <sub>10</sub> (Chlorophyll)       | 0.0576          | 0.0295                | 0.0508         |
| log <sub>10</sub> (PAR)               | 0.0708          | 0.0643                | 0.2711         |
| log <sub>10</sub> (Phosphate)         | -0.0214         | 0.0523                | 0.6830         |
| log <sub>10</sub> (Nitrate)           | 0.0116          | 0.0456                | 0.7995         |

153

154 **Table S2:** Effects of species richness on resistance of fish biomass to changing climate and  
 155 human impacts. Cells show standardized partial regression coefficients of interactions between  
 156 estimated richness and sea surface temperature (SST, mean and range) and log human population  
 157 index from global hierarchical models of reef fish log biomass. Bold black terms indicate  
 158 significant ( $P < 0.05$ ) stabilizing effects on biomass, i.e., richness reduces the effect of the  
 159 stressor. Gray terms are not significant at  $P < 0.05$ .

160

| <b>Response (biomass)</b>  | <b>SST mean</b> | <b>SST range</b> | <b>population</b> |
|----------------------------|-----------------|------------------|-------------------|
| all fish (global)          | <b>-0.127</b>   | <b>0.128</b>     | 0.014             |
| all fish (temperate)       | <b>-0.158</b>   | <b>0.075</b>     | -0.001            |
| all fish tropical)         | -0.031          | 0.030            | 0.030             |
| top carnivores (global)    | 0.012           | <b>0.080</b>     | -0.022            |
| top carnivores (temperate) | 0.007           | 0.047            | 0.001             |
| top carnivores (tropical)  | <b>-0.107</b>   | 0.045            | -0.050            |
| large fish (global)        | 0.010           | 0.040            | 0.008             |
| large fish (temperate)     | 0.003           | 0.000            | 0.034             |
| large fish (tropical)      | <b>-0.093</b>   | 0.040            | -0.022            |

161

162

163 **Table S3:** Functional traits used in the analysis of functional diversity (adopted from ref. 38).

| <b>Trait</b>                    | <b>Category</b> | <b>Units</b>                                                                               |
|---------------------------------|-----------------|--------------------------------------------------------------------------------------------|
| Maximum length                  | Body size       | Continuous (cm)                                                                            |
| Trophic breadth                 | Trophic niche   | Number of prey phyla consumed (1-8)                                                        |
| Trophic group                   | Trophic niche   | Browsing herbivore, scraping herbivore, benthic invertivore, planktivore, higher carnivore |
| Water column position           | Behavior        | Benthic, demersal, site-attached pelagic, roaming pelagic                                  |
| Gregariousness                  | Behavior        | Singleton, paired to forming small schools, always schools                                 |
| Diel activity pattern           | Behavior        | Nocturnal, diurnal                                                                         |
| Preferred substrate             | Habitat use     | Hard substrate, soft sediment                                                              |
| Habitat complexity requirements | Habitat use     | Low, medium, high                                                                          |

164

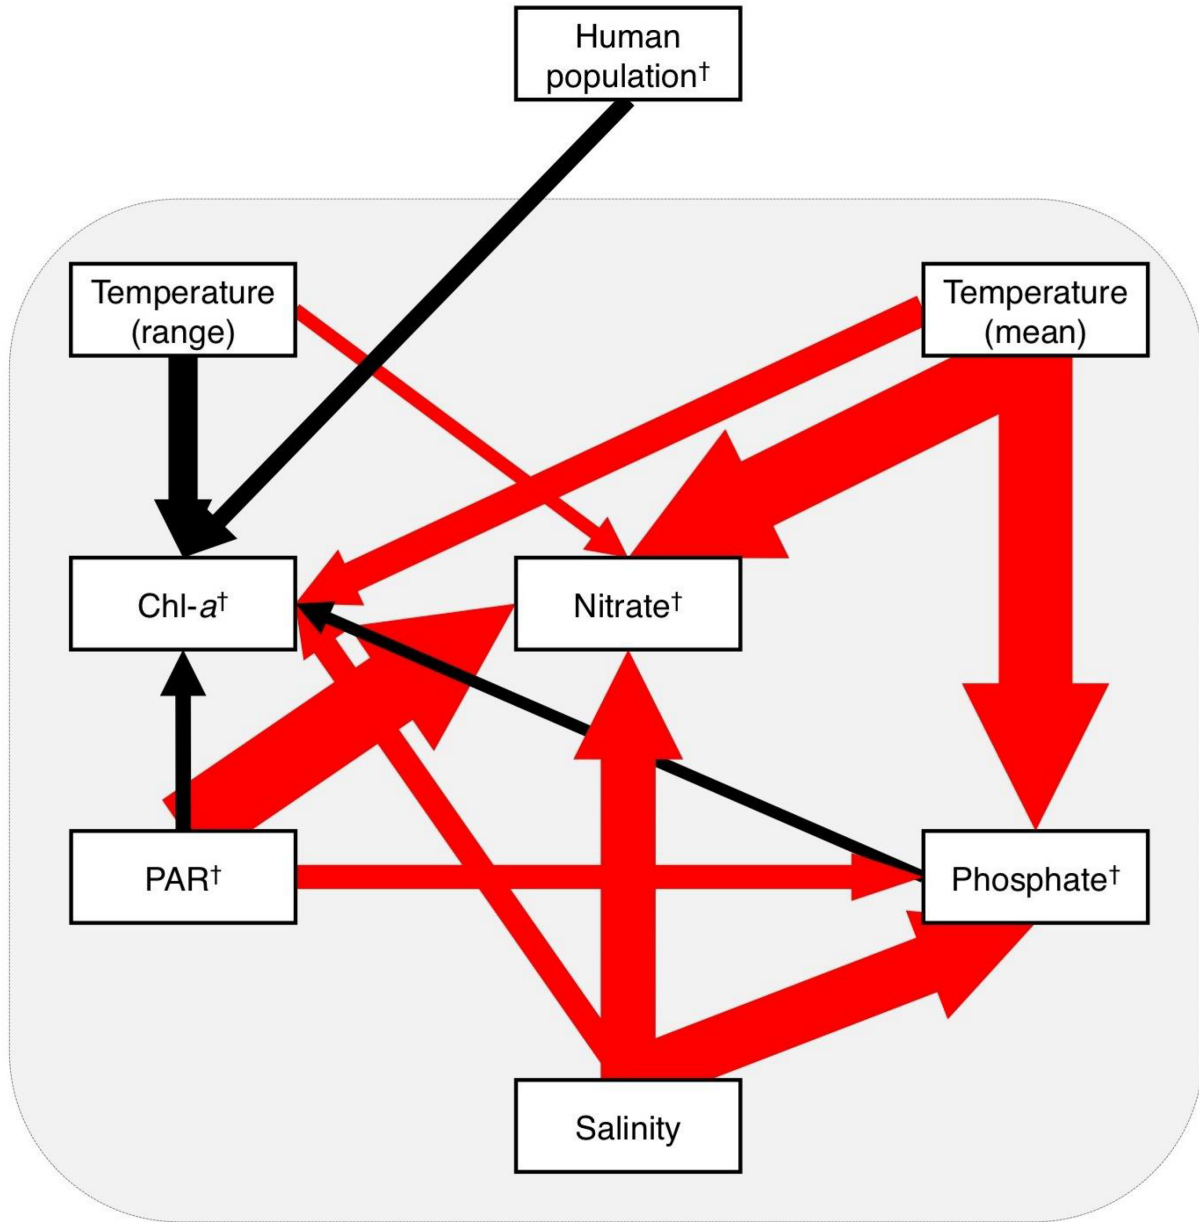

165

166 **Figure S1:** Path diagram of relationships among abiotic forcing factors, and human population,

167 influencing fish diversity and biomass (Fig. 1). Paths of  $\beta < 0.05$  are not shown. Gray box

168 surrounds abiotic variables plus phytoplankton (Chl-*a*). <sup>†</sup> = log<sub>10</sub>-transformed.

169

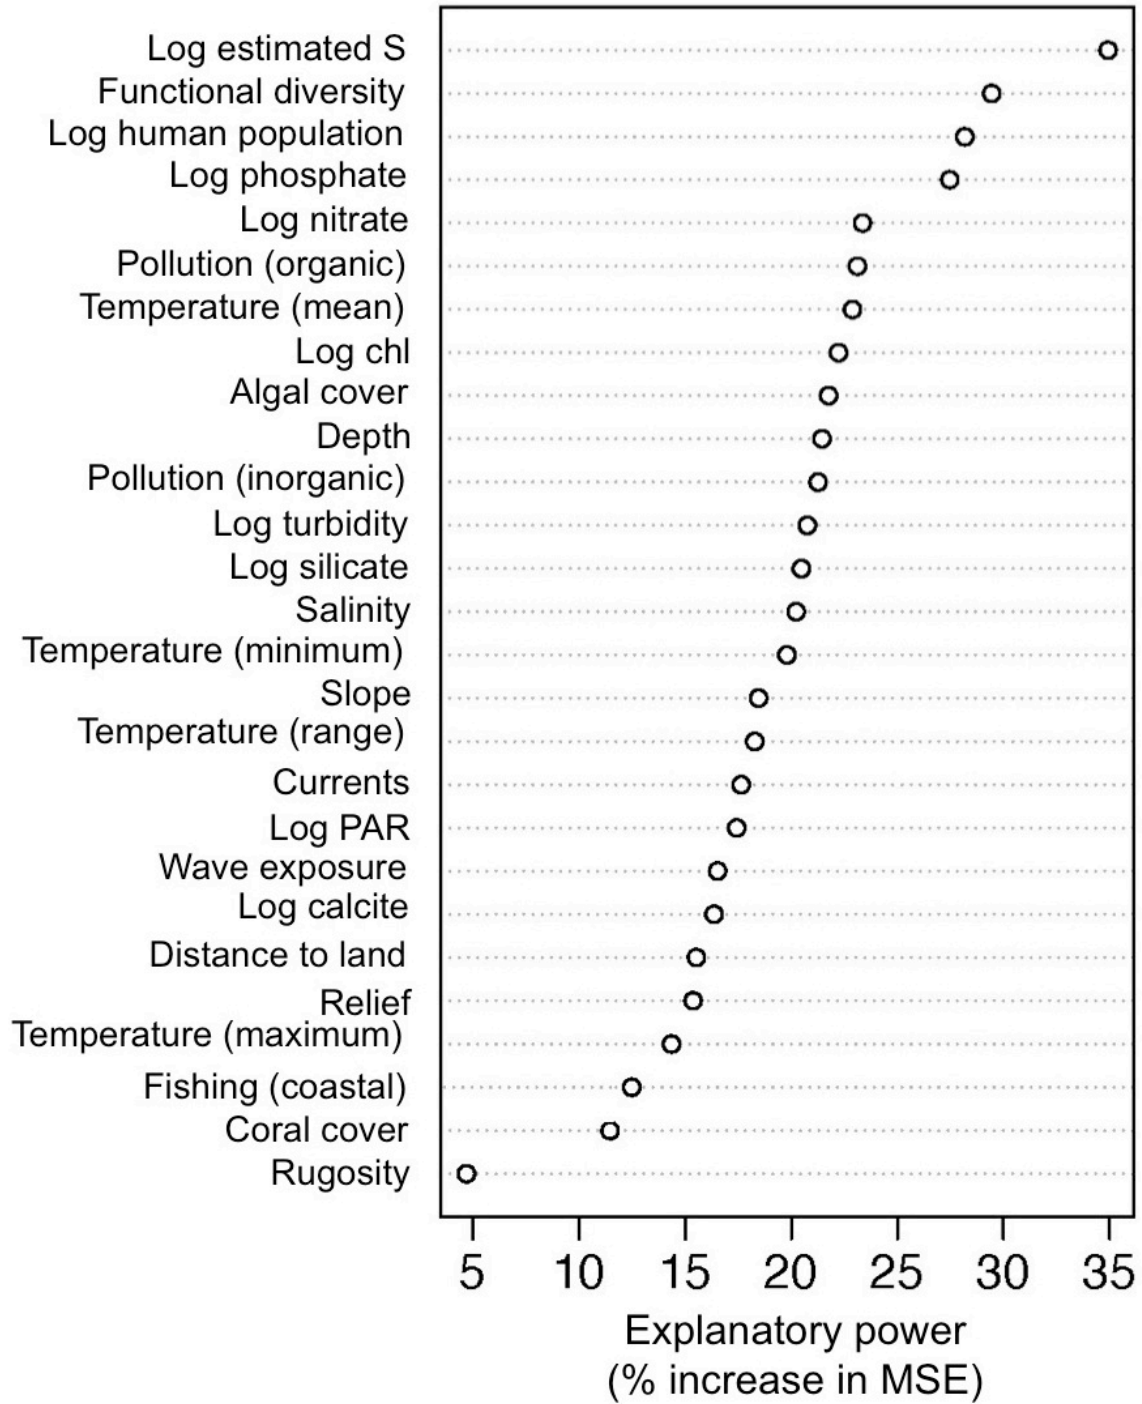

170

171 **Figure S2:** Results of random forest analysis of the relative importance of two diversity  
 172 components (functional diversity and estimated species richness), human population density, and  
 173 25 environmental variables to global reef fish biomass.

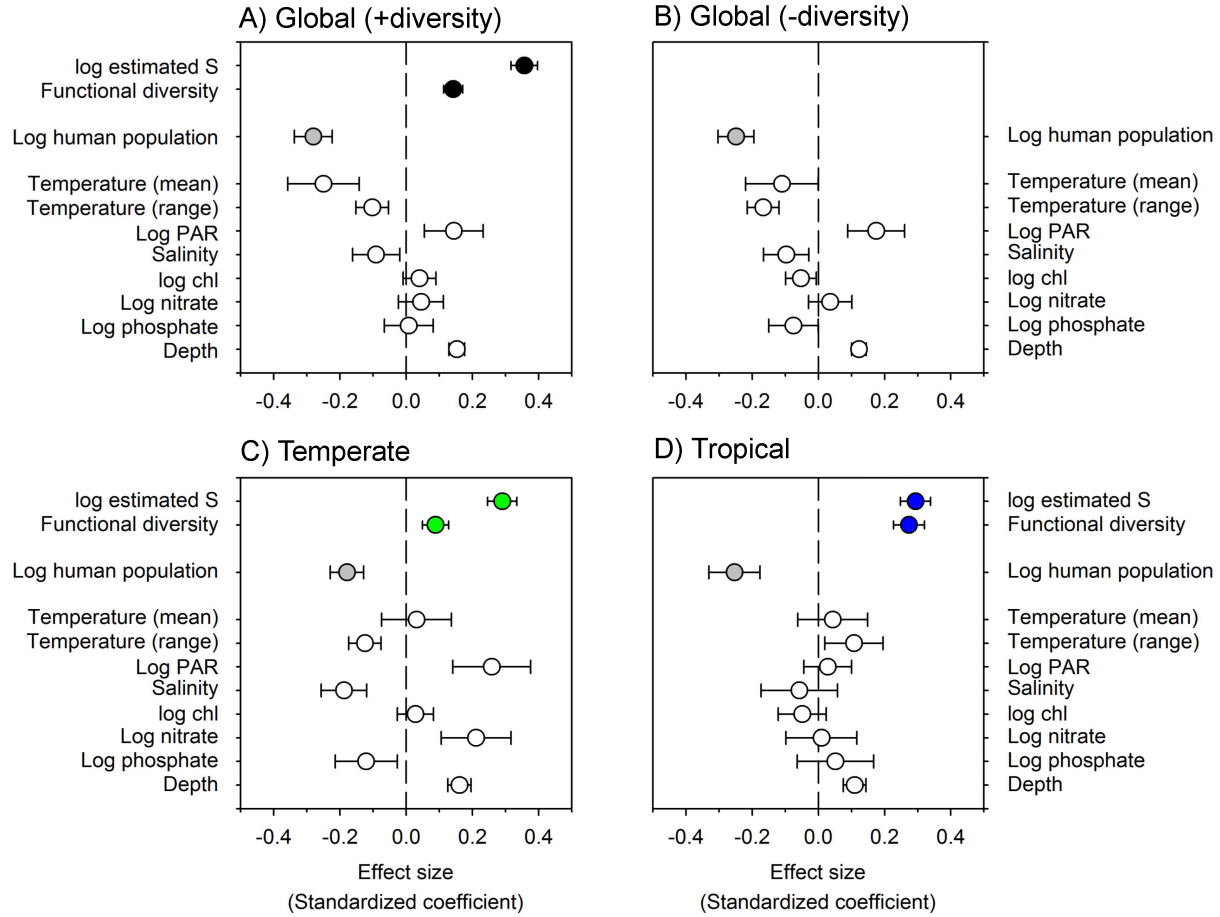

174

175 **Figure S3:** Relative influence of biodiversity and environmental factors on log biomass of large

176 (> 35 cm) reef fishes. Effect size estimated as standardized partial regression coefficients from

177 hierarchical linear models at the global level (A) with and (B) without diversity as predictors, and

178 separately for (C) temperate and (D) tropical sites.

179

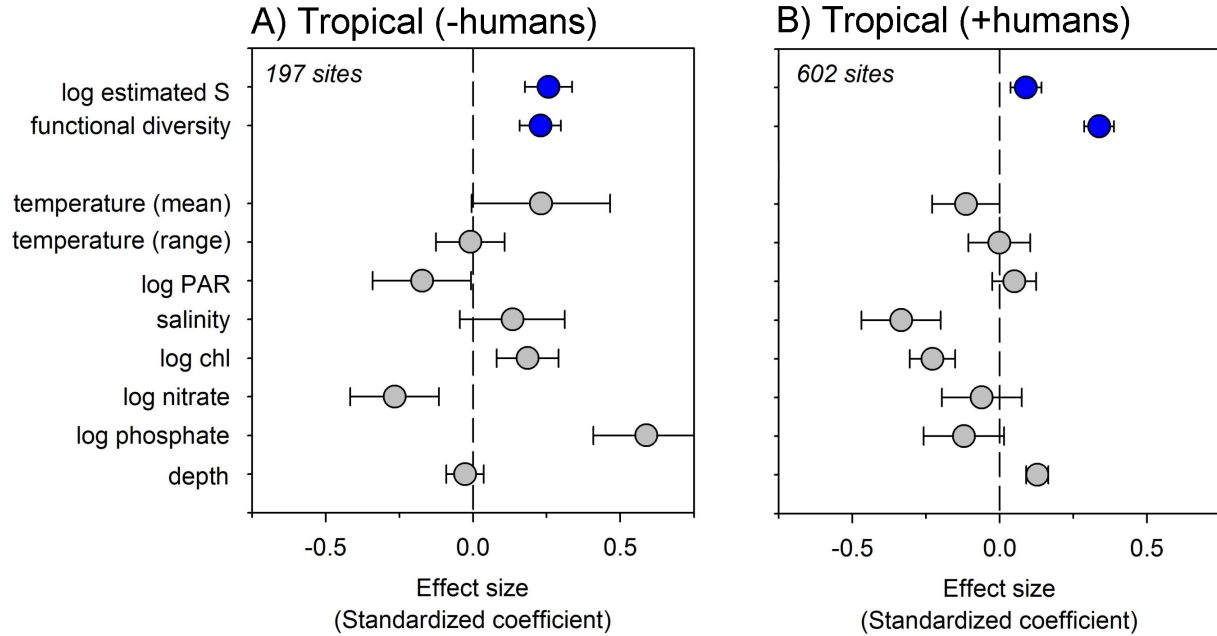

180

181 **Figure S4:** Relative influence of biodiversity and environmental factors on log biomass of  
 182 tropical reef fishes in the (A) absence and (B) presence of human population. Effects sizes are  
 183 standardized partial regression coefficients from hierarchical linear models estimated separately  
 184 for tropical sites without vs with human influence.

185



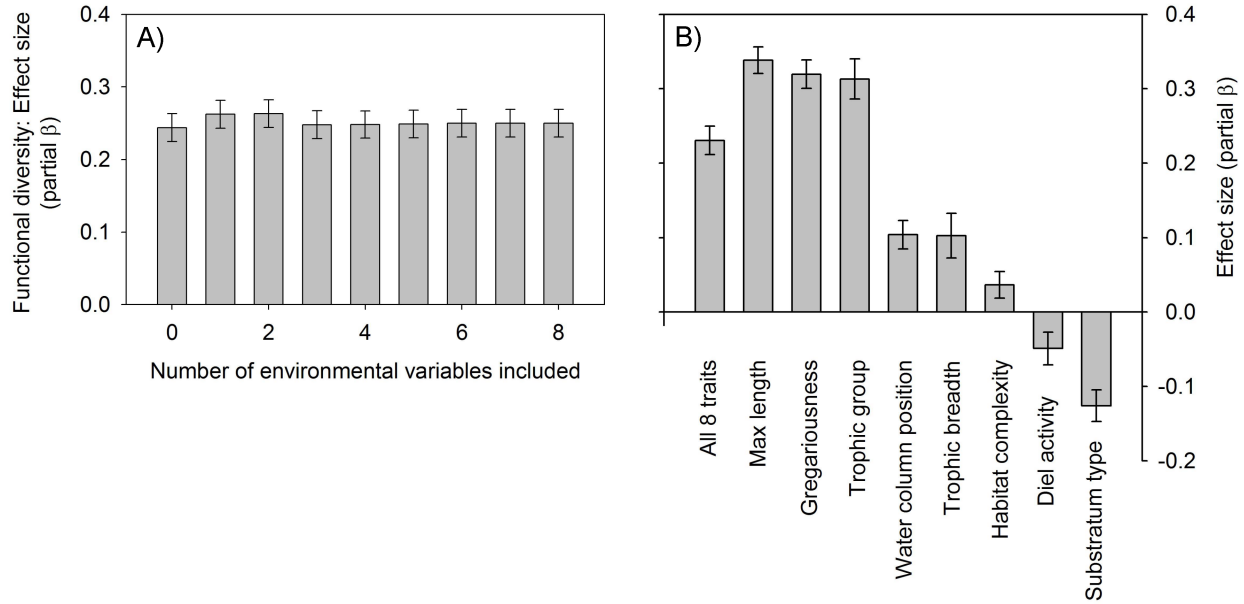

186

187 **Figure S5:** Effects of model construction on robustness of estimated diversity effects on reef fish

188 community biomass. (A) Estimated effect of functional diversity in hierarchical mixed models

189 including functional diversity alone (0) versus 1-8 environmental variables, added in decreasing

190 order of effect size. (B) Relative importance of component traits to estimated effect of functional

191 diversity on fish community biomass; effect size of functional diversity is calculated from all

192 eight traits versus from each individual component trait in the context of the global hierarchical

193 model.

194

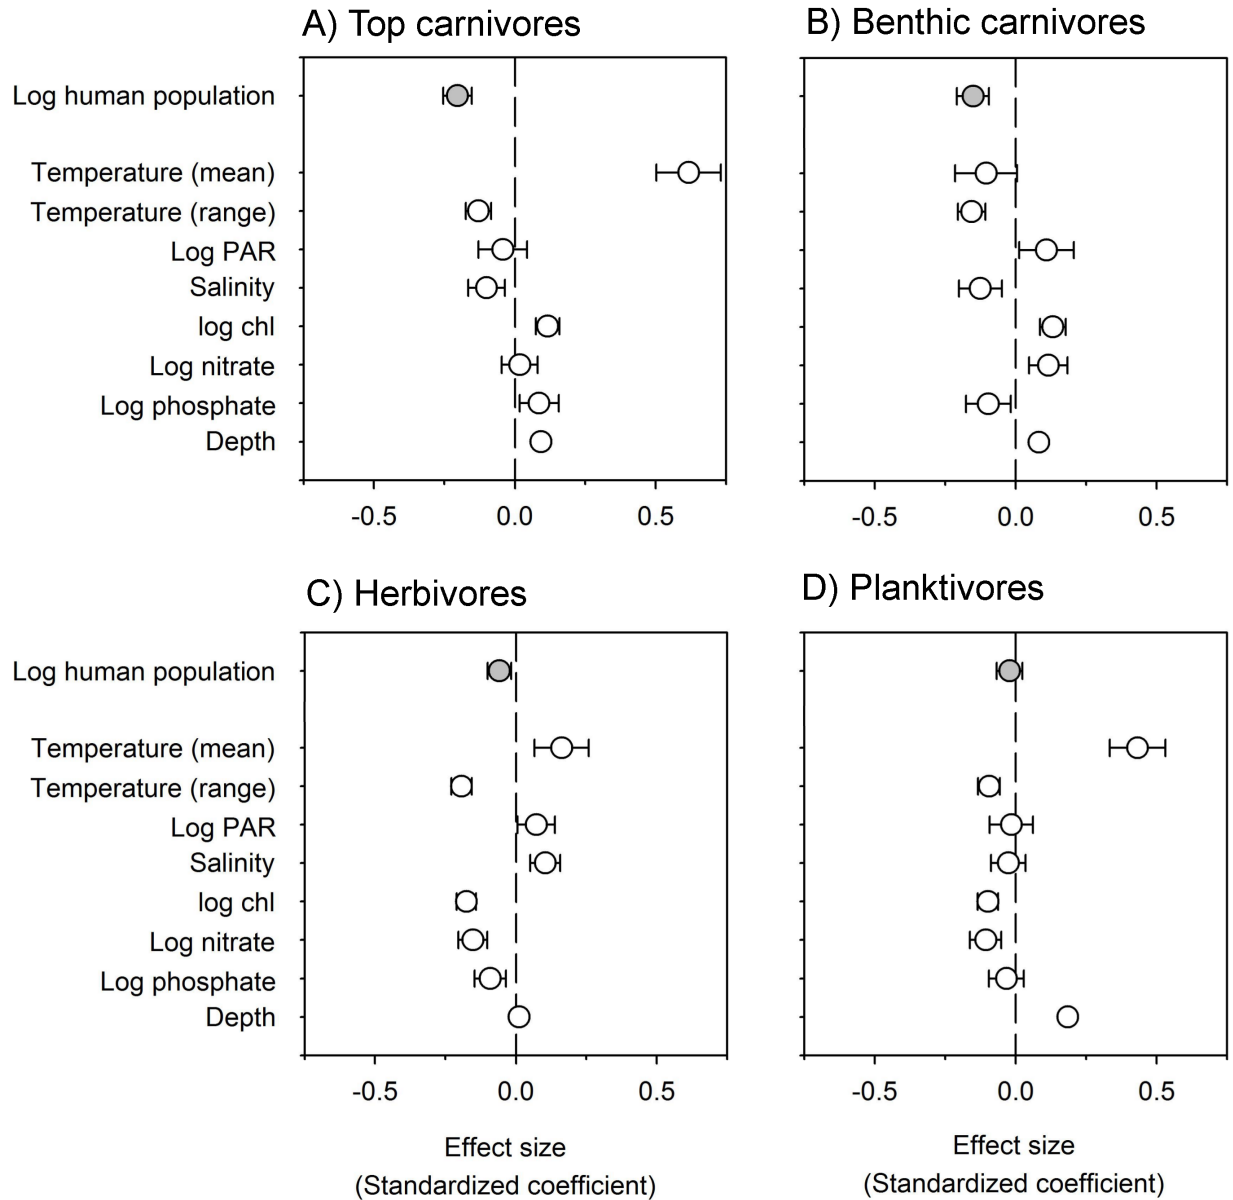

195

196 **Figure S6:** Relative influence of human population and environmental factors on log biomass of

197 different trophic groups of reef fishes. Effects sizes are standardized partial regression

198 coefficients from hierarchical linear models estimated separately by trophic level. This analysis

199 omits diversity as a predictor in order to include all sites, including those with no fishes at that

200 trophic level.

201
